# Supplementary material
Source: publisher figshare collection journal article supplement (https://gsajournals.figshare.com/ndownloader/files/18009632)
Supplement: Supplementary file 1 [file 18009632]

## Sheet: Sheet1
Table S3. The average value of the flowering traits in the wild-type (WT) and mutant (MT) siblings of the F1 hybrids between Oy1-N1989/+:B73 (as a pollen-parent) with respective BM-NILs. Parental (B73 and Mo17) F1 crosses that were planted as checks in each replication are given for comparison.
Pedigree	vey1 allele	Background	WT_DTA	WT_DTS	MT_DTA	MT_DTS	Ratio_DTA	Ratio_DTS
B73	B73		59.5	61.5	63	65	1.06	1.06
Mo17	Mo17		53	54.5	65	67	1.23	1.23
b094	Mo17	B73	59.5	60	72	74	1.21	1.23
b047	Mo17	B73	58.5	57.5	70	71	1.2	1.24
b107	Mo17	B73	60.5	60.5	72.5	74.5	1.2	1.23
b001	Mo17	B73	60	61	71.5	73.5	1.19	1.2
b123	Mo17	B73	60	61	71	72.5	1.18	1.19
b182	Mo17	B73	60.5	61.5	70.5	72.5	1.17	1.18
b049	Mo17	B73	61.5	63.5	73	75.5	1.19	1.19
b189	Mo17	B73	60.5	61.5	73	74	1.22	1.2
b132	B73	B73	61.5	62.5	67.5	69	1.1	1.1
b087	B73	B73	62.5	63.5	65	66.5	1.04	1.05
b092	B73	B73	60.5	62	64.5	66	1.07	1.06
b121	B73	B73	60	61.5	65	66.5	1.08	1.08
b035	B73	B73	59	60.5	62	63	1.05	1.04
b135	B73	B73	59.5	61	63	65.5	1.06	1.07
b185	B73	B73	60.5	62	66.5	68.5	1.1	1.1
b142	B73	B73	60	61	64.5	66.5	1.08	1.09
b030	B73	B73	58.5	59.5	62.5	63.5	1.07	1.07
b155	B73	B73	62.5	64	68.5	70.5	1.1	1.1
b139	B73	B73	56	57.5	60.5	62.5	1.08	1.09
b120	B73	B73	60.5	62.5	64	66.5	1.06	1.06
b055	B73	B73	61	62	64	66	1.05	1.06
b125	B73	B73	57.5	60.5	62	63.5	1.08	1.05
m043	Mo17	Mo17	54.5	55.5	66	67	1.21	1.21
m093	Mo17	Mo17	54.5	55.5	64.5	66.5	1.18	1.2
m035	Mo17	Mo17	54.5	59.5	65	66.5	1.19	1.12
m022	Mo17	Mo17	55.5	57	65	67.5	1.17	1.18
m051	Mo17	Mo17	56	57	66	67.5	1.18	1.18
m038	Mo17	Mo17	56	57.5	68.5	67	1.22	1.17
mo27	Mo17	Mo17	55	57.5	65	67	1.18	1.17
m079	Mo17	Mo17	54.5	54.5	63	64.5	1.16	1.18
m008	Mo17	Mo17	54.5	56	64.5	66.5	1.18	1.19
m002	Mo17	Mo17	57.5	59	63.5	65.5	1.11	1.11
m048	Mo17	Mo17	55.5	55.5	66.5	67	1.2	1.21
m097	B73	Mo17	56.5	57	59.5	61	1.05	1.07
mo24	B73	Mo17	57	58	61.5	62.5	1.08	1.08
